# Supplementary figures and images for: A study of oxidizing centers in carbon nanotubes by solid-state NMR
Source: Royal Society of Chemistry journal article supplement (doi:10.1039/c5ra07605f), 2015-01-01

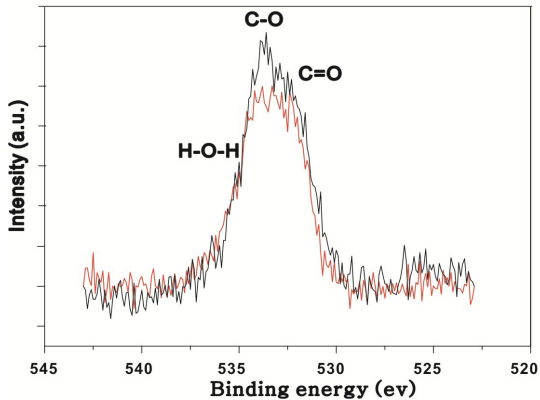

Supplement: c5ra07605f1.pdf [file c5ra07605f1.pdf]
